# Supplementary material for: Diplosphaera elongata sp. nova: Morphology and Phenotypic Plasticity of This New Microalga Isolated from Lichen Thalli
Source: MDPI journal article supplement (doi:10.3390/d15020168), 2023-01-25
Supplement: s1 [file s1]

## SUPPORTING INFORMATION

**Supplementary Figure S1.** Predicted secondary structure of the ITS2 transcript of *Diplosphaera elongata* (strain ASUV 135, GenBank accession number OK636219) compared with *D. chodatii* (SAG 49.86) as *Diplosphaera* genus epitype. Compensatory base changes (CBC) and hemi-compensatory base changes (hCBC) are indicated in a green box; single base changes are marked in grey circles.

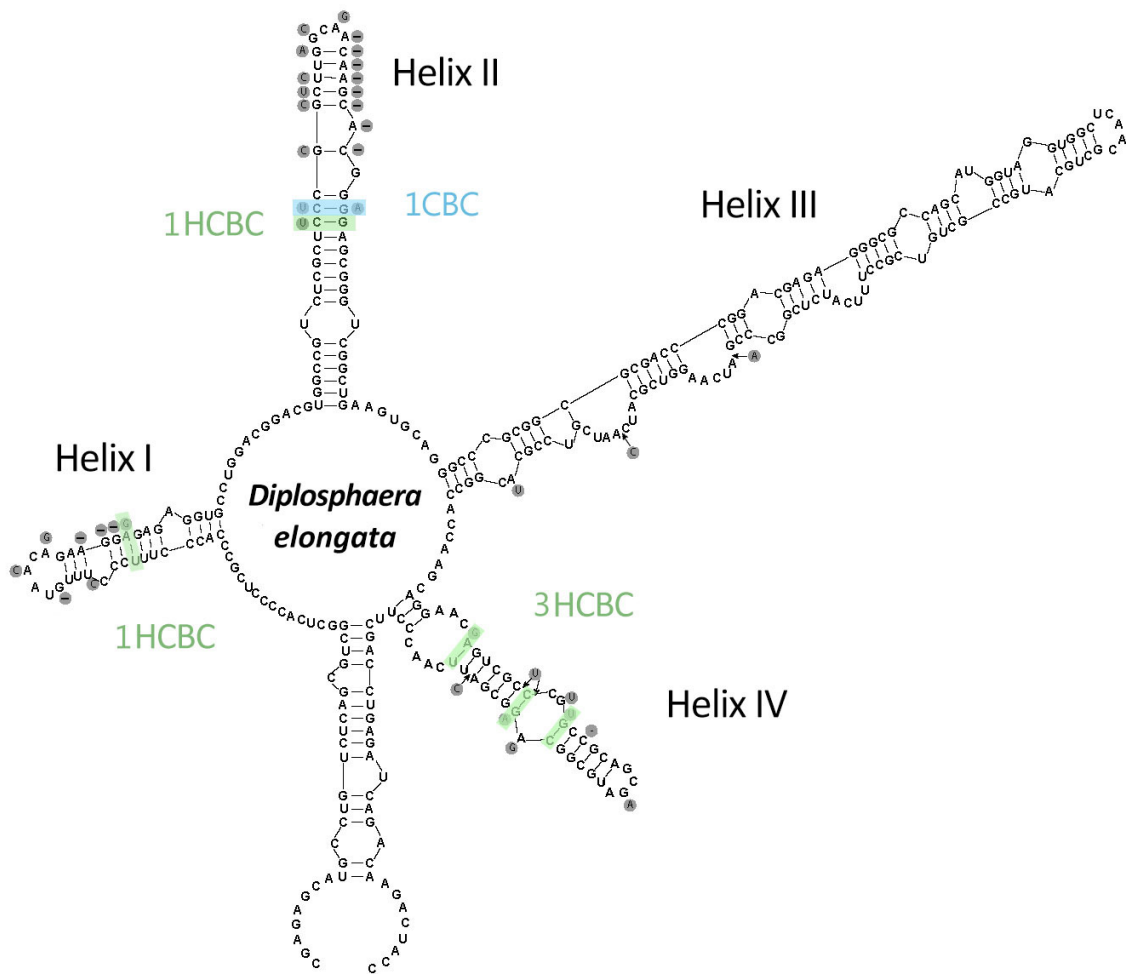

**Supplementary Figure S2.** Confocal reconstructions using CSML and transmitted light imaging of *D. elongata*.

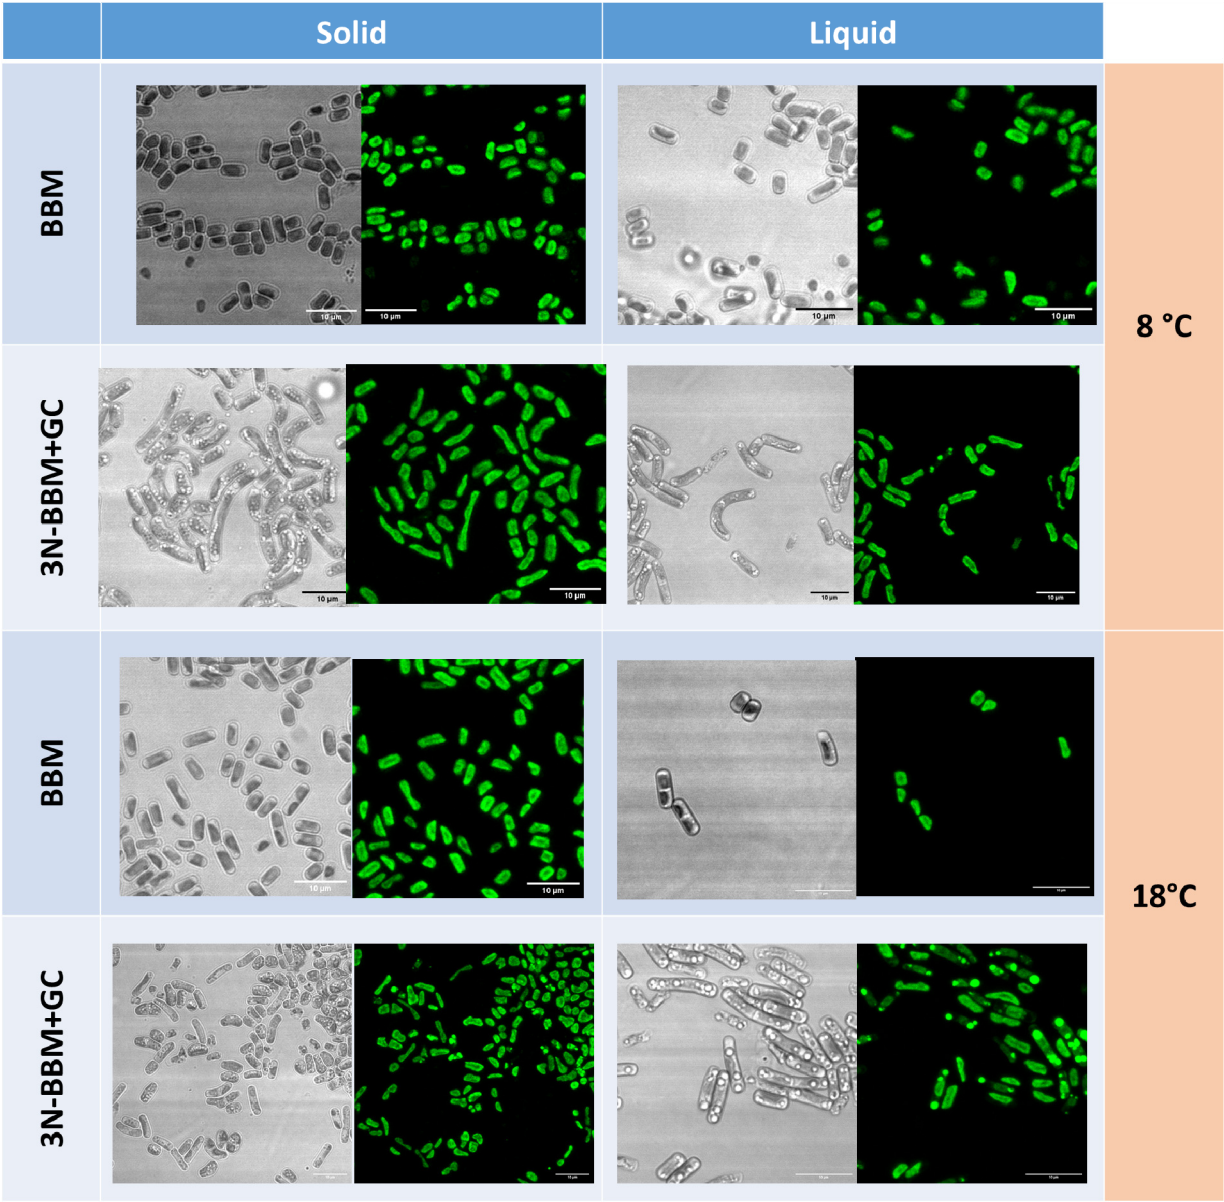

**Supplementary Figure S3.** The morphology of the strain *D. chodatii* CCAP 416/1 subjected to 3N-BBM+V, BBM and 3N-BBM+GC media at 8°C (solid and liquid) by differential interference contrast microscopy. Scale bars: 1 µm.

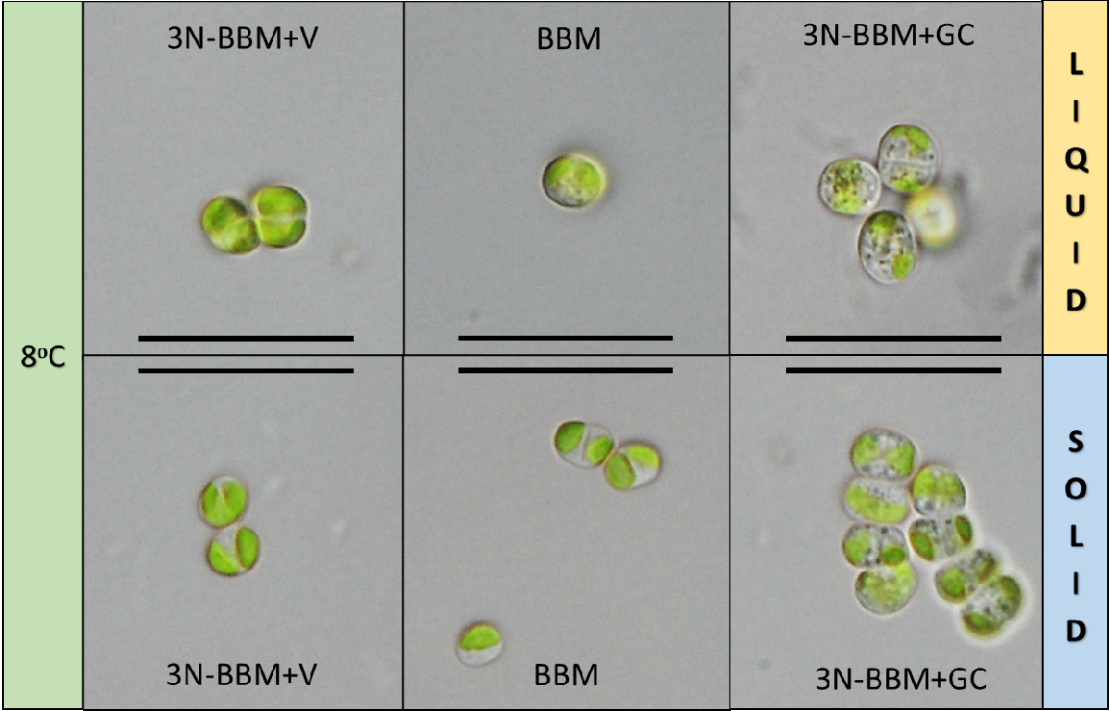

**Supplementary Figure S4.** Induction curves of chlorophyll a fluorescence of *D. elongata* grown under different mediums and at different temperatures. The parameters represent: A)  $\phi_{PSII}$ , effective quantum yield; B)  $F_t$ , steady-state measured fluorescence yield registered briefly before the pulse; and C) NPQ, non-photochemical quenching.

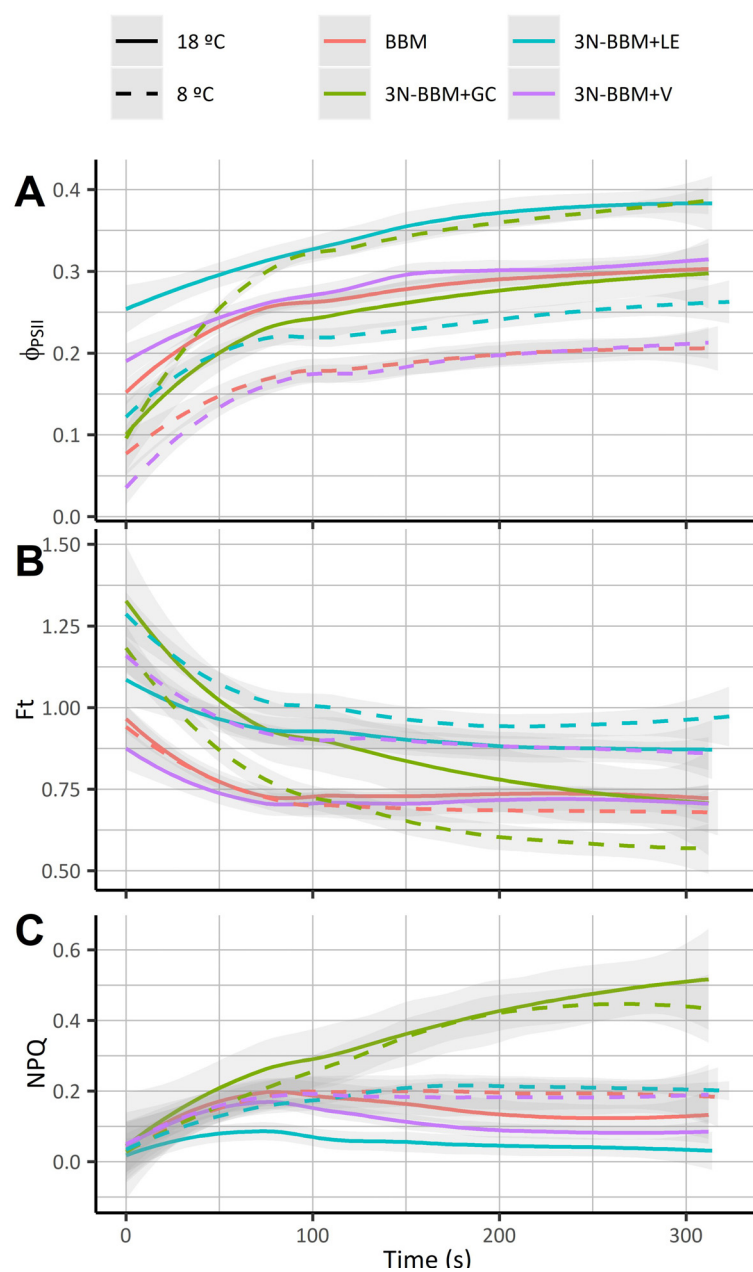

**Supplementary Table S1.** GenBank accession numbers for the species included in the phylogenetic analyses.

| Species                                         | Accession number SSU | Accession number ITS | Accession number RcbI |
|-------------------------------------------------|----------------------|----------------------|-----------------------|
| <i>Desmococcus olivaceus</i> SAG 63.90          | MT078160             | MT078160             | -                     |
| <i>D. olivaceus</i> SAG 1.94                    | MT078159             | MT078159             | -                     |
| <i>D. olivaceus</i> SAG 1.92                    | MT078158             | MT078158             | -                     |
| <i>D. olivaceus</i> SAG 25.92                   | MT078157             | MT078157             | -                     |
| <i>Deuterostichococcus allas</i> FiSo15/03fVI   | -                    | -                    | MH672671              |
| <i>D.allas</i> ASIB37                           | -                    | -                    | MH672681              |
| <i>D. allas</i> FiSo15/03cVI                    | -                    | -                    | MH672679              |
| <i>D. allas</i> Dec15/07cII                     | -                    | -                    | MH672653              |
| <i>D. allas</i> ASIB37                          | -                    | MH670394             | -                     |
| <i>D. allas</i> PC AB15                         | -                    | MH670339             | -                     |
| <i>D. allas</i> PA DI-NE                        | -                    | MH670395             | -                     |
| <i>D. allas</i> Dec15/07aIV                     | -                    | -                    | MH672649              |
| <i>Deuterostichococcus deasonii</i> SAG 2139    | MT078164             | MT078164             | -                     |
| <i>Deuterostichococcus lewinii</i> SAG 108.80   | MT078163             | MT078163             | -                     |
| <i>D. lewinii</i> SAG 107.80                    | MT078162             | MT078162             | -                     |
| <i>Deuterostichococcus epilithicus</i> SAG 2060 | MT078165             | MT078165             | -                     |
| <i>D. epilithicus</i> ST-3                      | MT078167             | MT078167             | -                     |
| <i>D. epilithicus</i> ST-4                      | MT078168             | MT078168             | -                     |
| <i>D. epilithicus</i> SAG 2119                  | MT078166             | MT078166             | -                     |

| Species                                 | Accession number SSU | Accession number ITS | Accession number RcbI |
|-----------------------------------------|----------------------|----------------------|-----------------------|
| <i>D. epilithicus</i> SAG 10.97         | MT078169             | MT078169             | -                     |
| <i>D. epilithicus</i> SAG 2482          | MT078170             | MT078170             | -                     |
| <i>Deuterostichococcus</i> sp. 1 MT27.1 | -                    | OK636223             | -                     |
| <i>Diplosphaera</i> sp. A07020          | -                    | HM237336             | -                     |
| <i>Diplosphaera</i> sp. A07020          | -                    | HM237335             | -                     |
| <i>Diplosphaera</i> sp. Ru-6-16         | MH703748             | MH703748             | -                     |
| <i>Diplosphaera</i> sp. L515            | -                    | -                    | JN573848              |
| <i>Diplosphaera</i> sp. L623            | -                    | -                    | JN573859              |
| <i>Diplosphaera</i> sp. CG671           | -                    | -                    | JN573832              |
| <i>Diplosphaera</i> sp. CG574           | -                    | -                    | JN573831              |
| <i>Diplosphaera</i> sp. L620            | -                    | -                    | JN573858              |
| <i>Diplosphaera</i> sp. CG458           | -                    | -                    | JN573820              |
| <i>Diplosphaera</i> sp. CG578           | -                    | -                    | JN573827              |
| <i>Diplosphaera</i> sp. L530            | -                    | -                    | JN573849              |
| <i>Diplosphaera</i> sp. L596            | -                    | -                    | JN573854              |
| <i>Diplosphaera</i> sp. L514            | -                    | -                    | JN573846              |
| <i>Diplosphaera</i> sp. CG586           | -                    | -                    | JN573823              |
| <i>Diplosphaera</i> sp. CG475           | -                    | -                    | JN573815              |
| <i>Diplosphaera</i> sp. CG115           | -                    | -                    | JN573814              |
| <i>Diplosphaera</i> sp. CG567           | -                    | -                    | JN573817              |
| <i>Diplosphaera</i> sp. L619            | -                    | -                    | JN573857              |
| <i>Diplosphaera</i> sp. L618            | -                    | -                    | JN573856              |
| <i>Diplosphaera</i> sp. J4028B          | -                    | -                    | JN573845              |
| <i>Diplosphaera</i> sp. CG585a          | -                    | -                    | JN573818              |
| <i>Diplosphaera</i> sp. L531            | -                    | -                    | JN573850              |
| <i>Diplosphaera</i> sp. L616            | -                    | -                    | JN573855              |
| <i>Diplosphaera</i> sp. CG608           | -                    | -                    | JN573834              |
| <i>Diplosphaera</i> sp. Llsn            | -                    | -                    | JN573819              |
| <i>Diplosphaera</i> sp. L594            | -                    | -                    | JN573851              |

| Species                                         | Accession number SSU | Accession number ITS | Accession number RcbI |
|-------------------------------------------------|----------------------|----------------------|-----------------------|
| <i>Diplosphaera</i> sp. MPN177                  | -                    | -                    | MN562635              |
| <i>Diplosphaera</i> sp. L540                    | -                    | -                    | JN573853              |
| <i>Diplosphaera</i> sp. MPN505                  | -                    | -                    | MN562636              |
| <i>Diplosphaera</i> sp. MPN178                  | -                    | -                    | JN573842              |
| <i>Diplosphaera</i> sp. L624                    | -                    | -                    | JN573860              |
| <i>Diplosphaera</i> sp. L469                    | -                    | -                    | JN573847              |
| <i>Diplosphaera</i> sp. CG470                   | -                    | -                    | JN573833              |
| <i>Diplosphaera</i> sp. AA53935                 | -                    | -                    | JN573824              |
| <i>Diplosphaera</i> sp. CG378                   | -                    | -                    | JN573822              |
| <i>Diplosphaera</i> sp. CG831                   | -                    | -                    | JN573835              |
| <i>Diplosphaera</i> sp. CG601                   | -                    | -                    | JN573825              |
| <i>Diplosphaera</i> sp. cort13                  | -                    | -                    | HG793070              |
| <i>Diplosphaera</i> sp. L532                    | -                    | -                    | JN573852              |
| <i>Diplosphaera</i> sp. cort12                  | -                    | -                    | HG793069              |
| <i>Diplosphaera</i> sp. CG27                    | -                    | -                    | JN573830              |
| <b><i>Diplosphaera chodatii</i> CCAP 416/1</b>  | <b>OP901443</b>      | <b>OP901443</b>      | <b>OP924018</b>       |
| <i>D. chodatii</i> SAG 2049                     | MT078180             | MT078180             | -                     |
| <i>D. chodatii</i> SAG 9.82                     | MT078181             | MT078181             | JF502540              |
| <i>D. chodatii</i> SAG 2.82                     | MT078179             | MT078179             | -                     |
| <i>D. chodatii</i> KZ-26-5                      | MK201746             | MK231275             | -                     |
| <i>D. chodatii</i> JX645020                     | -                    | JX645020             | -                     |
| <i>D. chodatii</i> var. <i>mucosa</i> SAG 48.86 | MT078178             | MT078178             | AM260444              |
| <i>D. chodatii</i> SAG 11.88                    | MT078177             | MT078177             | -                     |
| <i>D. chodatii</i> SAG 49.86                    | MT078182             | MT078182             | AM260445              |
| <i>D. chodatii</i> JX645018                     | -                    | JX645018             | -                     |
| <i>D. chodatii</i> JX645019                     | -                    | JX645019             | -                     |
| <i>D. chodatii</i> TE3.C                        |                      | OK636222             |                       |
| <i>D. chodatii</i> JX645021                     | -                    | JX645021             | -                     |
| <i>D. chodatii</i> JX645013                     | -                    | JX645013             | -                     |

| Species                                                                   | Accession number SSU | Accession number ITS | Accession number RcbI |
|---------------------------------------------------------------------------|----------------------|----------------------|-----------------------|
| <i>D. chodatii</i> JX645014                                               | -                    | JX645014             | -                     |
| <i>D. chodatii</i> JX645011                                               | -                    | JX645011             | -                     |
| <i>D. chodatii</i> JX645012                                               | -                    | JX645012             | -                     |
| <i>D. chodatii</i> JX645045                                               | -                    | JX645045             | -                     |
| <i>D. chodatii</i> JX645015                                               | -                    | JX645015             | -                     |
| <i>D. chodatii</i> JX645009                                               | -                    | JX645009             | -                     |
| <i>D. chodatii</i> JX645008                                               | -                    | JX645008             | -                     |
| <i>D. chodatii</i> JX645010                                               | -                    | JX645010             | -                     |
| <i>D. chodatii</i> UTEX 1177                                              | -                    | HQ129931             | -                     |
| <b><i>Diplosphaera elongata</i> ASUV135 (TE1.D)</b>                       | <b>OK636219</b>      | <b>OK636219</b>      | <b>OP882615</b>       |
| <i>D. elongata</i> PPS2.B                                                 | -                    | OK636234             | -                     |
| <i>D. elongata</i> PPS2.D                                                 | -                    | OK636235             | -                     |
| <i>D. elongata</i> RF5B.2                                                 | -                    | OK636220             | -                     |
| <i>D. elongata</i> RF5B.3                                                 | -                    | OK636221             | -                     |
| <i>Prasiolales</i> sp. S2MWC-09                                           | -                    | MK005079             | -                     |
| <i>Protostichococcus edaphicus</i> SAG 2481                               | MT078161             | MT078161             | -                     |
| <i>Pseudostichococcus monallantoides</i><br>SAG 380-1                     | KM020066             | KM020066             | -                     |
| <i>P. monallantoides</i> SAG 379-4                                        | MT078184             | MT078184             | -                     |
| <i>P. monallantoides</i> SAG 2067                                         | MT078185             | MT078185             | -                     |
| <i>P. monallantoides</i> UTEX 2249                                        | MT078186             | MT078186             | -                     |
| <i>Stichococcus</i> sp. FontaineG1 from<br><i>Dermatocarpon rivulorum</i> | -                    | JX645022             | -                     |
| <i>Stichococcus</i> sp. S2F4-03                                           | -                    | MK005073             | -                     |
| <i>Stichococcus</i> sp. S2RA-21                                           | -                    | MK005085             | -                     |
| <i>Stichococcus</i> sp. BCP-ZNP2-VF4                                      | -                    | -                    | KC207724              |
| <i>Stichococcus</i> sp. CU358a                                            | -                    | -                    | EF589147              |
| <i>Stichococcus</i> sp. cort05                                            | -                    | -                    | HG793062              |
| <i>Stichococcus</i> sp. cort02                                            | -                    | -                    | HG793061              |

| Species                                        | Accession number SSU | Accession number ITS | Accession number Rcb1 |
|------------------------------------------------|----------------------|----------------------|-----------------------|
| <i>Stichococcus bacillaris</i> isolate FG2/4.2 | -                    | KM020048             | -                     |
| <i>S. bacillaris</i> SAG 249.80                | MT078156             | MT078156             | -                     |
| <i>S. bacillaris</i> SAG 335-8                 | MT078154             | MT078154             | -                     |
| <i>S. bacillaris</i> SAG 56.91                 | MT078155             | MT078155             | -                     |
| <i>S. bacillaris</i> SAG 397-1b                | AJ416107             | AJ431678             | -                     |
| <i>S. bacillaris</i> SAG 379-2                 | HE610125             | HE610125             | -                     |
| <i>S. bacillaris</i> SAG 379-1b                | -                    | -                    | AM260442              |
| <i>Tetratostichococcus jenerensis</i> SAG 2138 | MT078183             | MT078183             | -                     |
| <i>T. jenerensis</i> CAUP J 1302               | -                    | -                    | KM438447              |
| <i>Tritostichococcus coniocybes</i> RF5A.1     | -                    | OK636233             | -                     |
| <i>Tritostichococcus coniocybes</i> ST-9       | MT078172             | MT078172             | -                     |
| <i>T. coniocybes</i> ST-7                      | MT078173             | MT078173             | -                     |
| <i>T. coniocybes</i> ST-6                      | MT078174             | MT078174             | -                     |
| <i>T. coniocybes</i> ST-8                      | MT078175             | MT078175             | -                     |
| <i>Tritostichococcus corticulus</i> ST-2       | MT078176             | MT078176             | -                     |
| <i>Tritostichococcus solitus</i> SAG 2406      | MT078171             | MT078171             | -                     |
| Uncultured fungus clone OTU 2309               | -                    | KX221524             | -                     |
| Uncultured Chaetophorales isolate soil 300     | -                    | MF481512             | -                     |
| Uncultured Chlorophyta                         | -                    | JX435329             | -                     |
| Uncultured eukaryote clone ITS1A H8            | -                    | HM490288             | -                     |
| Uncultured Chlorophyta clone ALCH11            | -                    | JX435395             | -                     |

**Supplementary Table S2.** Aspect Ratio (AR= With/Height) expressed as the Mean of each treatment. Between parentheses MIN; MAX of AR.

|                                  | Solid          |                | Liquid          |                |
|----------------------------------|----------------|----------------|-----------------|----------------|
|                                  | 8°C            | 18°C           | 8°C             | 18°C           |
| Standard conditions:<br>3N-BBM+V | 1.4 (1.0; 2.6) | 1.4 (1.0; 2.3) | 1.6 (1.4; 2.4)  | 1.5 (1.0; 3.1) |
| Poor conditions:<br>BBM          | 1.5 (1.0; 3.2) | 1.6 (1.0; 3.8) | 1.6 (1.0; 2.6)  | 1.7 (1.0; 3.7) |
| Rich conditions:<br>3N-BBM+GC    | 2.3 (1.1; 5.1) | 1.7 (1.0; 4.5) | 2.34 (1.0; 5.9) | 2.4 (1.1; 4.7) |
| Lichen conditions:<br>3N-BBM+LE  | 1.6 (1.0; 3.0) | 1.4 (1.0; 2.6) | 1.9 (1.0; 3.6)  | 1.7 (1.0; 3.1) |
